# Supplementary material for: Peroxisome proliferator‐activated receptor gamma (PPARγ) regulates lactase expression and activity in the gut
Source: PubMed Central journal article supplement (PMC5666307; doi:10.15252/emmm.201707795), 2017-09-25

SOURCE DATA FIGURE 1B

Magnification X40

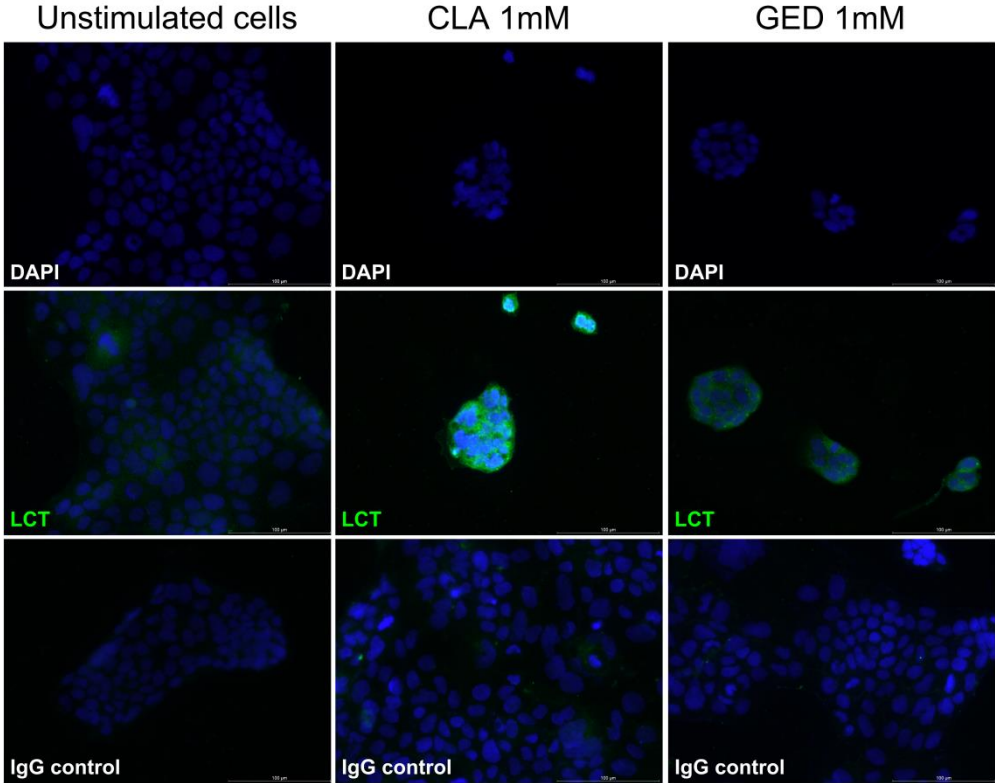

Magnification X40

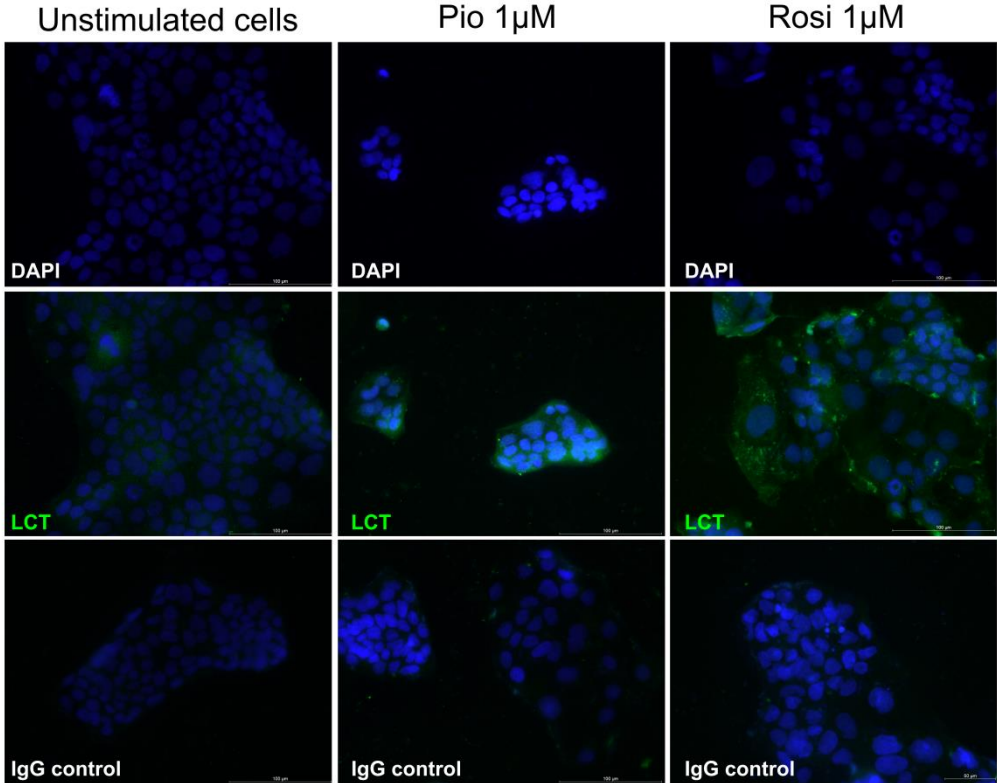

SOURCE DATA FIGURE 1C

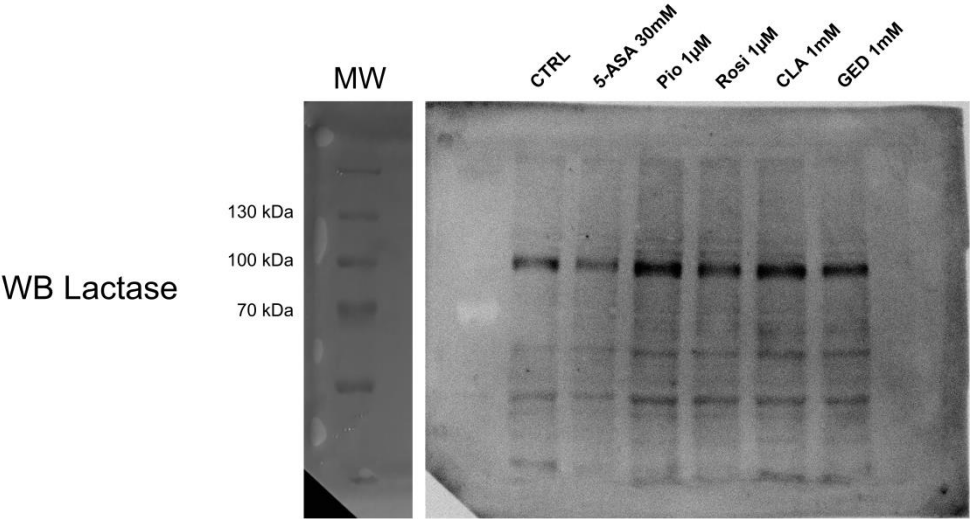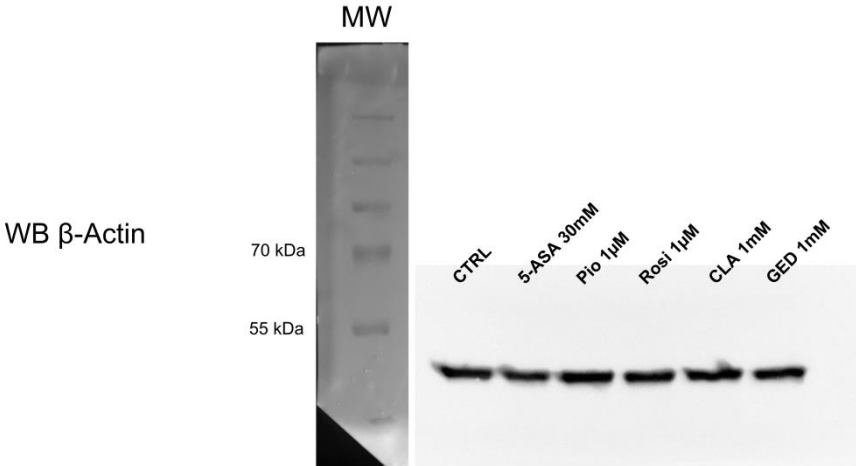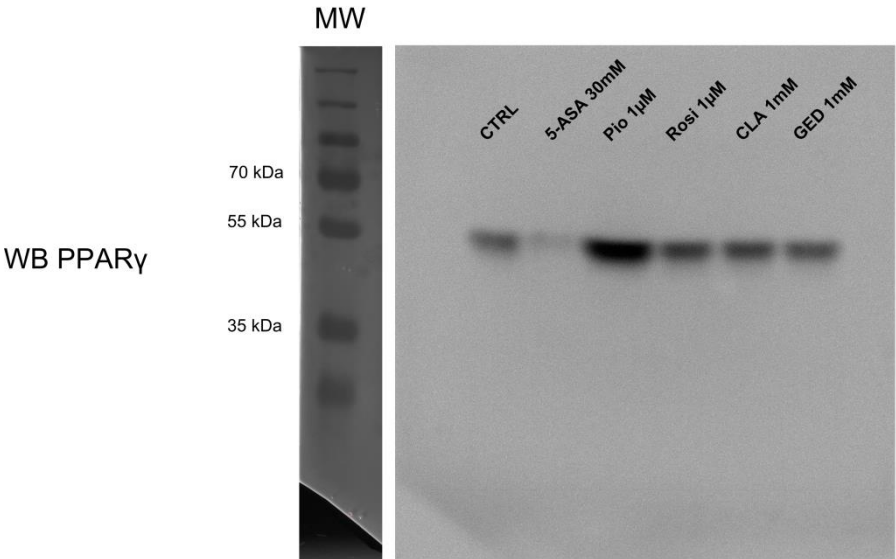

Supplement: EMMM-9-1471-s003.pdf [file EMMM-9-1471-s003.pdf]
